1 **Persistence of microcystin production of *Planktothrix agardhii* exposed to different**  
2 **salinity concentrations.**

3

4 Julia Vergalli<sup>1</sup>, Audrey Combes<sup>2,3</sup>, Evelyne Franquet<sup>1</sup>, Stéphanie Fayolle<sup>1</sup>, Katia Comte<sup>2\*</sup>,

5

6 <sup>1</sup> Institut Méditerranéen de Biodiversité et d'Ecologie Marine et continentale (IMBE) UMR  
7 7263 CNRS, Ecologie des Eaux Continentales, FST de Saint Jérôme, 13397 Marseille cedex  
8 20, France

9 <sup>2</sup> UMR 7245 MCAM CNRS-MNHN, Muséum National d'Histoire Naturelle, 12 rue Buffon  
10 CP 39, F-75231 Paris Cedex 05, France

11 <sup>3</sup> Present adress: Dept of Analytical, Bioanalytical Sciences and Miniaturization (LSABM),  
12 UMR CBI 8231 (CNRS-ESPCI Paris), ESPCI Paris, PSL Research University, 10 rue  
13 Vauquelin, 75 231 Paris Cedex 05, France.

14

15 \*Author to whom correspondence should be addressed; e-mail: [kcomte@mnhn.fr](mailto:kcomte@mnhn.fr)

16 Tel : +33140793176; Fax: +33140793594

17

18     **ABSTRACT**

19     Recent reports tend to predict the increase of harmful cyanobacteria in water systems  
20     worldwide due to the climatic and environmental changes, which would compromise water  
21     quality and public health. Among abiotic changes, the higher salinities are expected to  
22     promote the growth of some harmful species such as *Planktothrix agardhii*, which is known  
23     to build up blooms in brackish areas. Since *P. agardhii* is a common cyanotoxin producer  
24     (microcystin -producing), we investigated here the growth and tolerance of this species when  
25     exposed *in vitro* to a range of salinity levels, while assessing its microcystins variation and  
26     production in batch cultures during a time-frame experiment of 18 days. The study revealed  
27     a salt acclimation of the brackish *P. agardhii* that still produced microcystins in salty  
28     cultures while maintaining its growth ability in low to medium salinities (ranged from 0 to  
29     7.5 g L<sup>-1</sup>). For higher salinity concentrations (10 to 12.5 g L<sup>-1</sup>), microcystins were still  
30     detected, while significantly lower growth rates were obtained during the exponential growth  
31     phase. This suggests that moderate to high salt ranges do not inhibit the microcystins  
32     production of *P. agardhii* at least for several weeks. Finally, the predicted remediation  
33     perspectives in a context of environment salinization assumed by environmental policies  
34     may be insufficient to eradicate this potential toxic cyanobacteria, especially when this  
35     species is already dominant in the waterbodies.

36

37     **KEYWORDS:** *Planktothrix agardhii* – microcystin – salinity - Brackish environment-  
38     HABs species

39

## 40 INTRODUCTION

41 The massive occurrence and proliferation of cyanobacteria worldwide are serious issues  
42 as their bloom-forming abilities impair water quality (Twoney *et al.* 2002) in many ways (*i.e.*  
43 increasing turbidity, reducing biodiversity, leading to anoxia of the water column) and  
44 because some of common species are able to produce various toxic metabolites such as  
45 hepatotoxins and/or neurotoxins (Chorus and Bartram 1999). The most frequently found in  
46 waterbodies, including brackish areas (Sivonen and Jones 1999) are hepatotoxic microcystins  
47 (MCs) that can affect all living organisms from ciliates to fish (Combes *et al.* 2013; Ressom *et*  
48 *al.* 1994) and threaten human health (Chorus and Bartram 1999; Pouria *et al.* 1998).

49 MCs are cyclic heptapeptides that strongly (and irreversibly) inhibit serine-threonine  
50 protein phosphatases type 1 and 2A (Pearson *et al.* 2010) leading to cell disruption and death  
51 (Djediat *et al.* 2011). MCs have many structural variations (*i.e.* depending on the L-amino  
52 acid at the position 2 and 4 respectively from the whole MC architecture), and to date, over  
53 200 MCs variants have been identified (Spoon and Catherine 2017) with different cytotoxic  
54 potentials; depending on the tested MCs variants (Shimizu *et al.* 2014). While reports on the  
55 biosynthesis and chemical processes of the MCs are constantly in progress, the forces  
56 underlying toxin production, *i.e.* the ecological and biological functions of MCs for the  
57 producing-cells still remain elusive and mostly contradictory (Babica *et al.* 2006). Various  
58 hypotheses for the possible role of MCs have been proposed, including: allelopathic effects  
59 (Leao *et al.* 2009) grazer defenses, light harvesting adaptation (Kaebernick and Neilan 2001).  
60 Recent findings suggest a possible involvement in intracellular processes and in primary  
61 metabolism (Zilliges *et al.* 2011), while excluding an essential role for growth (Hesse and  
62 Kohl 2001). Moreover, one of the most challenging questions is how environment influences  
63 the changes in MC concentration during cyanobacterial blooms. Indeed, a better  
64 understanding of the environmental factors triggering and/or involving the variations of the  
65 MC production and changes in the composition of toxic *vs* non-toxic cells, is highly required  
66 to help to predict the potential health hazards.

67 Numerous studies have shown that some environmental parameters may influence the  
68 MC production in toxic cells, including (i) the prevalence of toxic clones *vs* non toxic ones  
69 (Briand *et al.* 2005) during unfavourable conditions (Kurmayer *et al.* 2004), (ii) the increase  
70 of MC amount in toxic cells (Sivonen and Jones 1999) and (iii) changes in the MC variants  
71 composition (Tonk *et al.* 2005; Pearson *et al.* 2010). Among the possible causal factors are:  
72 the nutrient concentration (Downing *et al.* 2005), temperature and light (Wiedner *et al.* 2003),

73 the iron concentration level (Sevilla *et al.* 2008) and pH (Song *et al.* 1998). Much less is  
74 known on many other abiotic parameters such as hydrologic variability, water bioavailability  
75 and salinity oscillations (N'Dong *et al.* 2014). Besides, the results are largely inconsistent as  
76 many factors (*i.e.* abiotic and biotic) may act in synergy and affect at different levels, the  
77 physiological state of the producing-cells (Davis *et al.* 2009).

78 All recent reports tend to predict that climatic change will exacerbate the dominance of  
79 harmful cyanobacteria in aquatic ecosystems worldwide (Paerl and Paul 2012; Carey *et al.*  
80 2012). Indeed, the eutrophication heightened by human activities, coupled with environmental  
81 changes (such as rising temperatures, enhanced stratification of the water column) should  
82 trigger and increase the frequency, the biomass and the duration of the harmful cyanobacterial  
83 proliferations of specific species in waterbodies (Paerl and Otten 2013; Hagemann 2011;  
84 Fastner *et al.* 1999). With regards to global warming change, the oscillations in precipitation  
85 including episodic periods of intensive rainfalls (*i.e.* floods) *vs* droughts, could be effective  
86 events in expanding the bloom-forming species distribution along the freshwaters to the  
87 coastal areas (Lehman *et al.* 2005), especially if they are able to tolerate some moderate to  
88 high salt ranges. Thus, the rapid runoff including toxic cyanobacterial transport, may  
89 contaminate and thus impair the aquaculture and fisheries plants located in downstream  
90 waters (Robson *et al.* 2003; Preece *et al.* 2017).

91 *Planktothrix agardhii* (Gomont) Anagnostidis & Komàrek is one of the most common  
92 freshwater MCs producer in temperate areas (Chomerat *et al.* 2007) and has also been  
93 reported to produce some blooms in several brackish waters (*i.e.* from 3 to 11 g L<sup>-1</sup> of NaCl)  
94 (Rojo *et al.* 1994; Villena *et al.* 2003). However, there are very few data on the influence of  
95 salinity on the MC production, because these widespread MC-producing species are mainly  
96 encountered in freshwaters. While *P. agardhii* is known to persist in brackish areas, it is  
97 important to investigate whether a rise of salinity may affect or not the ability of *P. agardhii*  
98 to produce MCs, as the actual remediation policy is performed by increasing the salinity of  
99 damaged and polluted waters to eradicate harmful organisms (Moisander *et al.* 2002; Von  
100 Alvensleben *et al.* 2013) (*i.e.* including potential toxic cyanobacteria) but for which evidence-  
101 based reports are still lacking. Therefore, we investigated the response of a dominant  
102 cyanobacterium *P. agardhii* strain originating from an oligohaline pond, to a gradient of  
103 salinity, and aimed to determine: i) the influence of the salinity range on the *P. agardhii*  
104 bloom development (growth and morphological changes), in batch cultures during a period of  
105 18-20 days; ii) the influence of salinity on the effective MC production.

106

## 107 **MATERIALS AND METHODS**

### 108 **Experimental section**

#### 109 *Strain isolation and culture conditions*

110 The *P. agardhii* strain ('Brack' strain) used in this study, was collected from the Olivier  
111 pond, in the vicinity of Istres, near the city of Marseille (in the south of France), located at 43°  
112 30' 46" N latitude and 4° 59' 17" E longitude. The Olivier pond is a eutrophic and oligohaline  
113 waterbody (average salinity of 3 g L<sup>-1</sup>), covering an area of approximately 225 ha, with a  
114 maximum depth of 10 m. *P. agardhii* is the dominant cyanobacterium throughout the year  
115 (Vergalli 2013). Water samples were collected at the pond surface during a *P. agardhii* bloom  
116 in order to isolate filaments. After isolating a single filament (Rippka 1988), the strain was  
117 maintained for several years, under non-axenic conditions in Z8 liquid medium (Kotai 1972),  
118 at 22°C, using a light:dark cycle of 14:10h and a constant bubbling air to ensure homogeneous  
119 mixing and to provide sufficient quantities of inorganic carbon. The 'Brack' strain was  
120 assigned to the species *P. agardhii*, according to the morphological criteria provided by  
121 (Komárek and Anagnostidis 2005) and maintained in the Paris Museum Collection (PMC-  
122 MNHN) under the reference PMC1014.18

#### 123 *Experimental setup*

124 For the experiments, NaCl was added to reach the final salinity concentrations of: 3, 5,  
125 7.5, 10, 12 and 15 g L<sup>-1</sup> and transferred with Z8 medium, into 250 mL Erlenmeyer flasks. The  
126 control corresponded to the culture maintained in Z8 medium (NaCl = 0 g L<sup>-1</sup>). Five  
127 replicates of each salinity concentration were checked with a conductivity meter (WTW  
128 LF330 Weilheim, Germany). The flasks were then inoculated with 'Brack' pre-culture in  
129 exponential growth phase and adjusted to obtain an initial OD<sub>750</sub> = 0.1. Batch cultures were  
130 maintained in growth chambers under the same experimental conditions as described above.  
131 The flasks were regularly replaced in order to homogenize the light exposition provided in the  
132 growth chambers.

#### 133 *Growth measurement*

#### 134 Biomass and growth rate

135 The growth kinetics of 'Brack' strain cultures were monitored by measuring optical  
136 density at 750 nm using a Shimadzu UV-1700 spectrophotometer. The growth rate ( $\mu$ ) was  
137 calculated using the following equation:

$$\mu = \frac{\ln x_2 - \ln x_1}{t_2 - t_1}$$

138 where  $t_1$  and  $t_2$  correspond to the measurement times (*i.e.*  $t_1$ : the beginning of the  
139 exponential phase and  $t_2$  (Day): the end of the experiment)  $x_2$  and  $x_1$  correspond to the  
140 biomass (expressed in OD values) at time  $t$  (with  $t_2 > t_1$ ).

141 Biovolumes and filaments' length

142 The biovolumes ( $\mu\text{m}^3$ ) were assessed on the basis of the cylinder shape of filaments,  
143 according to (Sun and Liu 2003):

$$BV = 0,5\pi lw$$

144 where  $l$  is the filament length ( $\mu\text{m}$ ) and  $w$  the filament width ( $\mu\text{m}$ ). A mean of 20  
145 filaments was randomly measured in a counting chamber, using a micro-scale with a Nikon  
146 Labphoto2 microscope.

147 Fluorescence microscopy was performed with a Zeiss Primo Star microscope equipped  
148 with an AxioCam IcC1 cam. Epifluorescence images were recorded with specific filter (CY3)  
149 presets for chlorophyll *a* and acquired with the same time exposure set (AxioVision LE  
150 software).

151 *Characterization of MC-variants*

152 Template preparation

153 Three ml of mature culture of the 'Brack' strain were centrifuged (4000g for 10 minutes).  
154 The supernatant was discarded and the cell pellet was resuspended with 1 mL of  
155 methanol/water (90/10, v/v), followed by for 4 pulses of sonication on ice for 30 seconds. The  
156 mixture was centrifuged at 8000 g for 15 minutes at 4°C. The supernatant was collected,  
157 filtered (GF/C 1.2  $\mu\text{m}$ ) and evaporated (with a speed-vac concentrator at 40°C). The extract  
158 was dissolved in 100  $\mu\text{L}$  water with 0.1% formic acid and centrifuged (4000 g X 5 minutes,  
159 4°C). The supernatant was directly injected into the LC/ESI-MS system.

160 LC/MS analysis

161 LC/ESI MS and LC/ESI-MS/MS experiments were performed on a liquid chromatograph  
162 (LC) (UltiMate 3000®, Dionex) coupled to a Quadrupole-Time of flight (Q-TOF) hybrid  
163 mass spectrometer (Pulsar, Applied Biosystems) equipped with an electrospray ionization  
164 source (ESI). The chromatographic separation was conducted on a ACE3-C18 reverse-phase  
165 column (100 mm x 1 mm x 3 µm). Mobile phases were MilliQ water containing 0.1% (v/v)  
166 formic acid (A), acetonitrile containing 0.07% of formic acid (v/v) (B). The LC separation  
167 was achieved at a flow rate of 40 µl.min<sup>-1</sup> using a gradient elution from 10 to 30% of solvent  
168 B in 5 minutes, then, from 30 to 70% B in 17 minutes, hold at 70% B for 5 minutes, return  
169 from 70 to 10% B in 3 minutes and hold at 10% B for 15 minutes. The mass spectrometer was  
170 operated with an electrospray ionization source in positive ion mode. For mass spectra, the  
171 capillary voltage was set to 2500 V with a declustering potential of 20 V. Full scan mass  
172 spectra were performed from 100 to 1500 m/z at 1s/scan in continuum mode. Fragmentation  
173 spectra were obtained in automatic mode using nitrogen as a collision gas, with collision  
174 energy automatically determined by the software according to the mass-to-charge ratio (m/z)  
175 values.

176 LC/ESI-MS et LC/ESI MS/MS data analyses

177 MS/MS spectra were analysed manually for highlighted spectra which contained the  
178 fragment ion (m/z= 135.1) characteristic of MCs fragmentation. All others ions fragments  
179 present on the fragmentation spectra were used to elucidate the structure of the MCs. The  
180 LC/ESI-MS data were processed using BioAnalyst 1.1 software. The molecular weight  
181 distribution of species (ranging from 100 Da to 1500 Da) observed in each sample were  
182 generated using the LC-MS reconstruct option. As the signal observed for both MC standards  
183 were close, the proportion of each variant was calculated by comparing the peak area  
184 corresponding to a given MC-variant to the total peak area of all MCs variants in a given  
185 sample.

186 *MC concentration*

187 Microcystins concentrations were determined by Enzyme Linked Immuno-Sorbent Assay  
188 (ELISA) using the MC-ADDA ELISA kit, (Abraxis LLC). ELISA tests were applied on  
189 supernatants from the cultures (*i.e.* cells pellets and supernatants), previously disrupted by a  
190 sonication on ice (2 pulses of 1 min, max. speed) according to the previous protocol Comes et  
191 al. 2013). The mixture was then centrifuged at 8000 x g for 15 min at 4°C. The supernatant  
192 was collected and diluted in water v:v= 1:100 to 1:1000 (according to the biomass between

193 T0 and T18) to avoid some matrix effects and potential salt interferences, as mentioned in the  
194 “Technical bulletin for microcystins in brackish and seawaters samples”(Abraxis). The  
195 measurements were performed in duplicate, on different samples exposed to each salinity  
196 treatment at Days 0, 2, 6, 8, 10 and 18. The limit of detection was approximately 0.10 ppb ( $\mu\text{g}$   
197  $\text{L}^{-1}$ ). The MC contents were expressed in  $\mu\text{g L}^{-1}$  equivalent of MC-LR. Due to the positive  
198 correlation between the biovolumes (*i.e.* quantitative unit) and the biomass (*i.e.*  $\text{OD}_{750}$  values),  
199 ( $r^2= 0.80$ ;  $n=40$ , Fig. S2) the MC contents were converted and normalized per biomass  
200 ( $\text{OD}_{750}$ ) as a proxy of MC quota in order to compare the different MC patterns overtime by  
201 minimizing the growth factor.

## 202 *Statistical analyses*

203 ‘Brack’ growth curves were fitted with the best trend approximation from absorbance  
204 measurements overtime, following the equation (Kahm *et al.* 2010):

$$y(t) = \frac{A}{1 + \exp\left(\frac{4\mu}{A(\lambda - t)} + 2\right)}$$

205 where ‘A’ is the asymptote in the curve and an estimation of the maximal density of the  
206 population reached during the life cycle;

207 ‘ $\mu$ ’ is the maximal slope of the growth curve and characterizes the exponential growth  
208 phase (day 6 to 18); ‘ $\lambda$ ’ is the lag-phase period of the growth (*i.e.* Day 2).

209 Two parameters (growth rate and maximal density) obtained from the logistic curves  
210 implemented with the ‘grofit’ package (Kahm *et al.* 2010) were used to compare the ‘Brack’  
211 growth under various salinity treatments. Normality and homoscedasticity were  
212 systematically checked, using the Shapiro-Wilk and the Fligner-Killeen tests respectively.  
213 Consequently, the significant differences of growth (growth rate, biomass and filaments’  
214 length) between the salinity treatments were performed by the One-Way Analysis of Variance  
215 (ANOVA) ( $n=5$ ) and Tukey’s post-hoc test. The differences in MC concentrations were tested  
216 by Kruskal-Wallis test (between salinity treatments) and by Mann-Whitney test, when the MC  
217 patterns were compared to the control. The Pearson correlation coefficients were calculated  
218 between the growth variables and the MC concentrations. All statistical tests were carried out  
219 in R-2.14.0 environment and Statview (Roth *et al.* 1995).

220

## 221 **RESULTS**



222 *Cell growth and morphological changes induced by exposition to various NaCl*  
223 *concentrations*

224 Optical density (OD<sub>750</sub>) was recorded every day (from T0 to T18) to monitor the cultures  
225 growth and calculate the growth rate ( $\mu_{max}$ ). While the highest salinity treatment (15g L<sup>-1</sup>)  
226 had a drastic effect on the strain growth (Fig. 1), the Brack strain was able to survive and  
227 grow from low to high salinity concentrations (from 3 to 12 g L<sup>-1</sup>) along the timeline of the  
228 experiment (18 days).

229

230 **Figure 1.** Growth dynamics of *P. agardhii* ‘Brack’ strain at different salinity  
231 concentrations, obtained using OD<sub>750</sub> values (n= 5,  $\pm$  SD) from T0 to T18 (A) and fitted  
232 with the ‘grofit’ package.

233

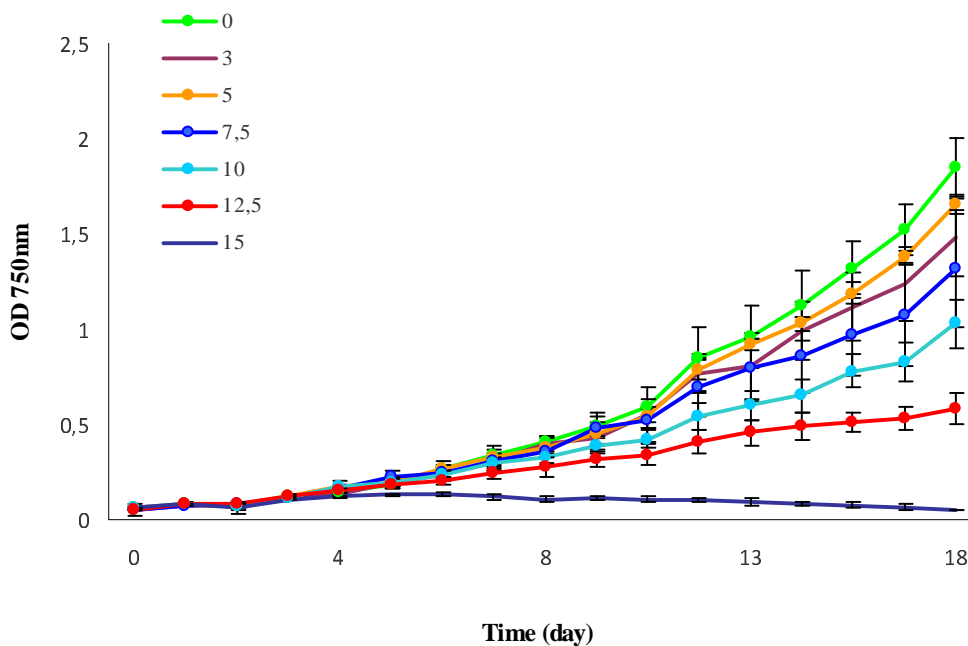

234

235

236 Two growth profiles can be distinguished: one that includes the control and the low salt  
237 concentrations that corresponds to a progressive increase of growth and a similar growth rate  
238 (ANOVA,  $P > 0.05$ ); and a second profile corresponding to the high salt concentrations (7.5 to  
239 12.5 g L<sup>-1</sup>) which revealed a significant decrease in terms of biomass, growth rate and density  
240 (Table 1) especially at Day 8.

241

242

| Salinity (g. L <sup>-1</sup> ) | Growth rate $\mu$ (day <sup>-1</sup> ) |            |           | Max. Density ( 10 <sup>3</sup> cell/ml) |           |           |
|--------------------------------|----------------------------------------|------------|-----------|-----------------------------------------|-----------|-----------|
| 0                              | 0,25                                   | $\pm 0,05$ | <b>a</b>  | 2,4                                     | $\pm 0,1$ | <b>a</b>  |
| 3                              | 0,19                                   | $\pm 0,02$ | <b>a</b>  | 2,3                                     | $\pm 0,4$ | <b>b</b>  |
| 5                              | 0,20                                   | $\pm 0,01$ | <b>a</b>  | 2,6                                     | $\pm 0,2$ | <b>a</b>  |
| 7.5                            | 0,15                                   | $\pm 0,02$ | <b>ab</b> | 2,3                                     | $\pm 0,5$ | <b>b</b>  |
| 10                             | 0,12                                   | $\pm 0,02$ | <b>ab</b> | 2,2                                     | $\pm 0,6$ | <b>bc</b> |
| 12.5                           | 0,05                                   | $\pm 0,01$ | <b>b</b>  | 0,9                                     | $\pm 0,6$ | <b>c</b>  |
| 15                             | 0                                      | —          |           | 0,01                                    | —         |           |

243

244 **Table 1.** Descriptive parameters including the growth rate and cell density were determined  
 245 from growth curves fitted by the ‘grofit’ model. The different letters mentioned above (a,b,c)  
 246 indicate significant differences between the salinity treatments (Tukey test,  $p < 0,01$ ).

247

248 Additionally microscopic observations were performed every two days to estimate the size of  
 249 filaments and detect some morphological changes in the whole cells and filaments. The  
 250 physiological state of the filaments was assessed by the light and epifluorescence microscope  
 251 taking intact morphology and chlorophyll autofluorescence intensity as indicators of survival.  
 252 The decrease of chlorophyll content (*i.e.* OD values) with increasing salinity treatments, was  
 253 correlated to a decrease of the total biovolumes *i.e.* consecutive to morphological changes and  
 254 to a reduction of filament size (Fig. 2A). While the filaments had an approximate length of  
 255 240  $\mu\text{m}$  at the beginning of the experiment (T=0), a first morphological variation was noted as  
 256 early as Day 2 to Day 8 for moderate treatments (5 to 7.5 g L<sup>-1</sup>), consisting in a significant  
 257 increase in the filament lengths up to a maximum (521 $\mu\text{m}$  as compared with the control  
 258 (ANOVA  $p < 0.05$ ).

259 The elongation process was observed for cultures at 5 to 7.5 g L<sup>-1</sup> of salinity, between  
 260 Day 2 and Day 8 (ANOVA  $p < 0,01$ ), followed by a reduction of length beyond Day 10 (which  
 261 were not significantly different from those measured for the control experiment-NS) (Fig.  
 262 2A). For the high salinity treatments (12.5 to 15g L<sup>-1</sup>), a significant reduction in the length of  
 263 filaments was detected after 14 days, with a mean length not exceeding 60  $\mu\text{m}$  as compared to  
 264 the usual 350  $\mu\text{m}$  of control experiment (Fig. 2 A). A remarkably high number of short  
 265 fragments constituted by only 5-10 cells were observed at 15 g L<sup>-1</sup> of salinity, at the end of  
 266 experiment (Figs. 2D). Typical morphologies are shown in Figs. 2B, C, D. High intensity of  
 267 the chlorophyll autofluorescence was still detected in short filaments, even after 20 days of  
 268 incubation (Figs. 2C, D). Single cells located along the short filaments (at 12. 5 to 15 g L<sup>-1</sup> of  
 269 salinity) were sometimes completely dark (Fig. 2E- no fluorescent), corresponding to necridia  
 270 or “suicidal-cell” referred to in [38] which split the filament in two fragments.

271

272 **Figure 2.** Variations of the filament length in  $\mu\text{m}$ , for cultures grown at different salt  
 273 concentrations. A) Means with different letters (a, b, c) show significant differences between  
 274 salinities concentrations ( $p < 0.05$ , ANOVA, Tukey post-hoc test). Error bars indicate standard  
 275 deviation ( $n = 60$ ). The asterisks indicate significant differences compared to the control (day =0)  
 276 size. (NS= not significant difference; \*=  $p < 0.05$ ; \*\*=  $p < 0.01$ ; \*\*\*=  $p < 0.001$ ). B, C, D, E)  
 277 Micrographs of size-type filaments observed in epifluorescence microscopy based on the  
 278 chlorophyll autofluorescence (CY3 filter) in control (B), at  $12,5 \text{ g L}^{-1}$  (C) and  $15 \text{ g L}^{-1}$  of salinity  
 279 (D, E) after 18 days of incubation. The yellow arrow (E) showed a necridia (non-fluorescent cell).  
 280 Scale bars=  $100\mu\text{m}$  (B); =  $20\mu\text{m}$  (C, D) and =  $10\mu\text{m}$  (E) respectively.

281

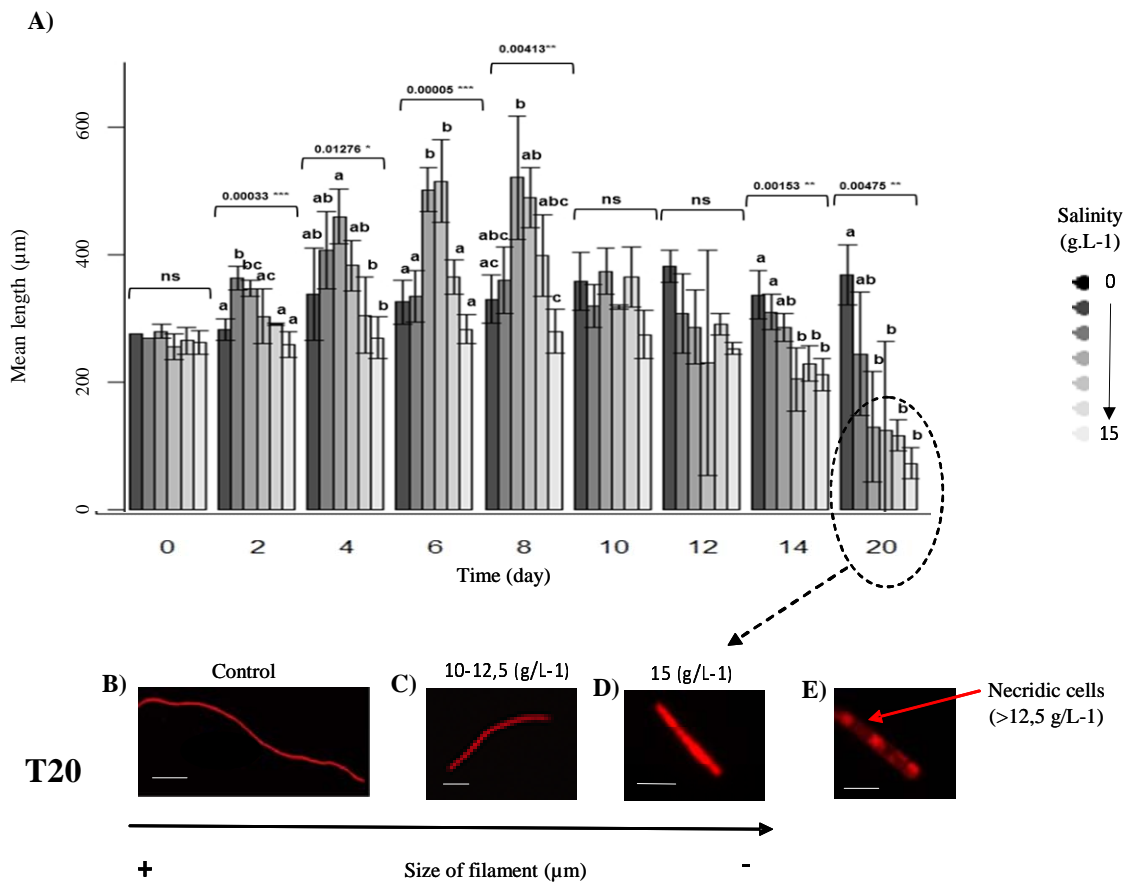

282

283

#### 284 *Characterization of the MC-profile in the Brack strain*

285 The characterization of the MC-variant composition was performed by liquid chromatography  
 286 coupled to electrospray ionisation mass spectrometry (LC/ESI-MS/MS) in order to identify  
 287 the chemo-type profile of the 'Brack' strain under optimal conditions (Fig. S1), as a various  
 288 MC-diversity may exist within a same species Shimizu et al. 2014; Tonk et al. 2005). Five

289 MC variants, (two major and three minor variants) were determined from cultured ‘Brack’  
 290 strain (Table 2).

291

| Peak | m/z          | MH <sup>+</sup> | rTmin – rTmax<br>(in min) | Variants of MCs               | Proportion (%) of MC<br>variants* |
|------|--------------|-----------------|---------------------------|-------------------------------|-----------------------------------|
| 1    | <b>512,8</b> | 1024,6          | 16,7 – 17,1               | [Asp3]MC-RR                   | <b>83</b>                         |
| 2    | 523,3        | 1045,6          | 18.6 – 18,9               | [Asp3]MC-HtyR                 | 2                                 |
| 3    | <b>491,3</b> | 981,6           | 18,9-19,4                 | [Asp3]MC-LR                   | <b>10</b>                         |
| 3    | 502,2        | 1003,4          | 19 – 19,4                 | Undetermined MC<br>DeMC-YR ou | 1                                 |
| 4    | 516,2        | 1031,4          | 20,8 – 21,2               | [Asp3, Dha7]MC-<br>HtyR       | 4                                 |

292

293 **Table 2.** LC-ESI-MS determination of the individual MC-variants detected in the ‘Brack’ strain. The  
 294 Identification of the MC-variant corresponds to ions detected on the mass spectra (m/z), and retention  
 295 time (RT) compared to the standards. The proportion for each MC-variant was also included in the  
 296 table. The m/z = 512.8 ; 491.3 and 523.3 with the respective retention time (RT) of 16.8 min; 19.2 min  
 297 and 18.7 min were identified and confirmed by the corresponding MC standard. \* Variants obtained  
 298 under optimal conditions. Microcystins were quantified using [Asp3] MC-RR and [Asp3] MC-LR  
 299 (Alexis Corporation) standards.

300

301 Based on the Adda fragment signal (m/z 135.1) and on the MS/MS spectra and the  
 302 retention times of other ions (identical to MS standards and their MS/MS spectra), two major  
 303 ions doubly charged [M+2H]<sup>2+</sup>, (Table 2) were identified respectively as [Asp3]MC-RR and  
 304 [Asp3]MC-LR which altogether represent 93% of MCs present in this strain. Among the three  
 305 minor ions, only one was clearly characterized as the demethylated [Asp3]MC-HtyR (Table  
 306 2), while the doubly charged [M+2H]<sup>2+</sup>, (m/z = 516.2 with a RT of 21 min) was assigned to  
 307 be either [Asp3]MC-YR or [Asp3,dha7]MC-HtyR. The ion m/z = 502.2 was undetermined  
 308 and could not be assigned to [Asp3]MC-LR, referred to in (Yuan et al. 1999).

### 309 *Impact of the salinity treatments on the MC contents*

310 In order to simplify the analysis and especially to get a better idea of the whole MCs present  
 311 in the cell culture, the quantification of the total MCs, including both extra- and intracellular  
 312 MC fractions, was assessed by using the microtiter plate MC-Adda ELISA test in all salinity

313 treatments. The total MC contents ( $\mu\text{g L}^{-1}$ ) were positively correlated to the biomass (*i.e.* OD  
314 values) as suggested by the high  $r^2$  values for all the salinity treatments except  $15 \text{ g L}^{-1}$  ( $r^2=$   
315  $0,037$ ), (Fig. 3). All the salts conditions, led to similar MC concentration profile including a  
316 progressive increase in MC content from 0 to Day 12, followed by a maximal concentration at  
317 Day 18 for 0 to  $12,5 \text{ g L}^{-1}$  of salinity (Kruskal Wallis,  $p>0.05$ ). At  $15 \text{ g L}^{-1}$ , a maximal peak  
318 was also present at Day 18, contrasting with a concomitant arrest in cell growth ( $\mu=0$ ).

319 **Figure 3.** Variations of the MC contents ( $\mu\text{g.eq. MC-LR/ L}^{-1}$ ) of *P. agardhii* ‘Brack’ strain  
320 (means  $\pm$  standard deviation,  $n=3$ ) compared to the biomass ( $\text{OD}_{750}$  values) over time (18 days).

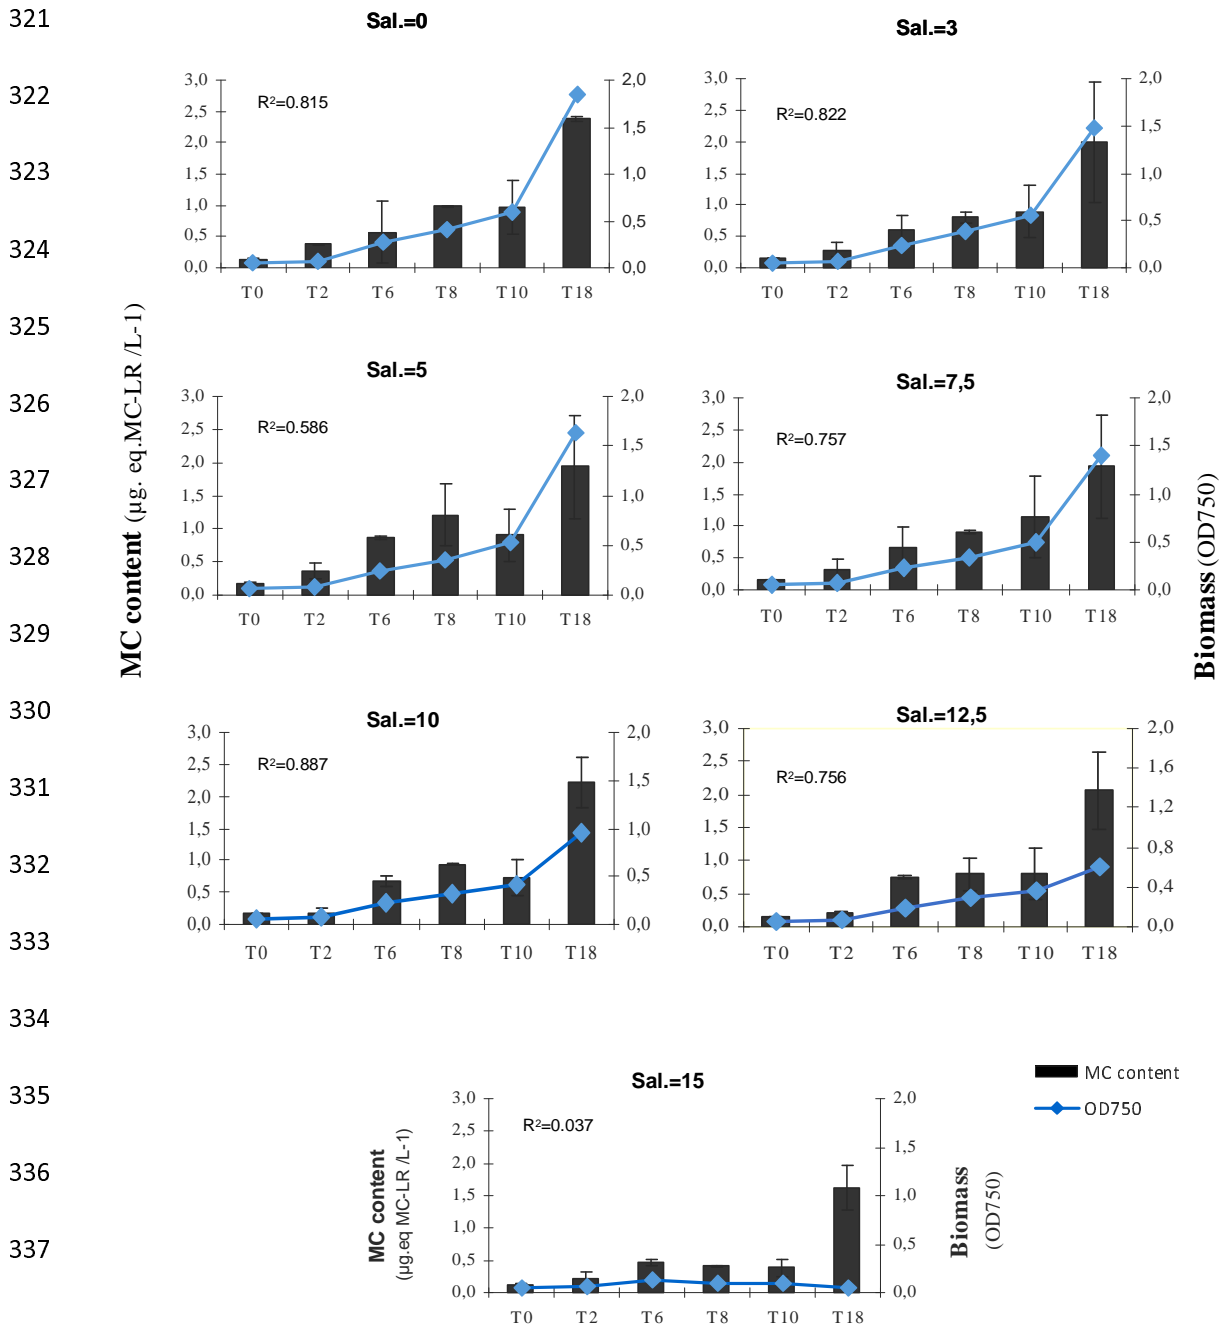

338

339 Since a positive correlation was obtained between the biovolumes ( $\mu\text{m}^3$ ) and the biomass  
340 (OD values- Fig. 2S) for all samples taken into consideration ( $r^2= 0.85$ ,  $n= 70$ ), we could  
341 normalize the MC contents ( $\mu\text{g}$  equivalent) per biomass, as a proxy of MC quota to  
342 discriminate the MC profiles in various salinities and over time, so as to minimize the  
343 biomass factor. In more detail, the MC concentration showed four different profiles  
344 depending on the time frame and the salinity concentrations (two-way ANOVA,  $p<0.05$ ). A  
345 first group was observed between 3 and 7.5  $\text{g L}^{-1}$  and the control (Kruskal-Wallis,  $p>0.05$ )  
346 where the MC quota reached its highest value at Day 2 followed by a progressive decline  
347 from Day 8 to Day 18. Some slight differences were detected for the 5  $\text{g L}^{-1}$  treatment (group  
348 2) at Days 6 and 8 ( $p<0.05$ - Fig. 4), for which a still high MC value was noted at Day 2 but  
349 without the constant decline of MC previously observed in the group 1 and the control. For  
350 these groups, the MC quota was negatively correlated to the logarithm of biomass ( $r= -0.82$ ,  
351  $p= 5.8\text{e-}11$ ,  $n= 42$ ) and biovolumes ( $r= -0.76$ ,  $p= 5.2\text{e-}09$ ,  $n= 42$ ) throughout the experiment  
352 (Days 2 to 18). A third MC profile was characterized for the 10 and 12,5  $\text{g L}^{-1}$  treatments,  
353 including a rather stable MC concentration throughout the experiment with a moderate  
354 increase at Days 6 and 8 (Fig.4), that differed significantly from the control ( $p<0.01$ ). The last  
355 group referred to the highest salinity (15  $\text{g L}^{-1}$ ) and showed an increase of the MC  
356 concentration from Day 2 to Day 10, with a maximal value (7 times higher than control-  
357  $p<0,001$ ) at the end of experiment (Fig. 4).

358

359 As the ELISA test was applied to the whole culture (*i.e.* extracellular and intracellular  
360 fractions) it was not possible to confirm that the MC content came from the vivid cells or the  
361 media (suggesting a release of MCs after the cell death). Finally, the relative constant  
362 proportion of MC content from Day 2 to Day 10 for the 15  $\text{g L}^{-1}$  treatment revealed no  
363 minute-lethal effect of the 'Brack' strain, suggesting a rather high tolerance of this strain to  
364 the salt stressor.

365

366

367

368

369

370 **Figure 4.** Evolution of MC contents (expressed as eq MC-LR  $\mu\text{g}/\text{biomass}$ ) in the ‘Brack’ strain,  
371 for each salinity treatment, overtime (0 to Day 18). The asterisks indicate significant differences  
372 compared to the control (Mann-Whitney test). NS= Not significant; \*=  $p<0,05$ ; \*\*=  $p<0,01$ ;  
373 \*\*\*= $p<0,001$ ).

374

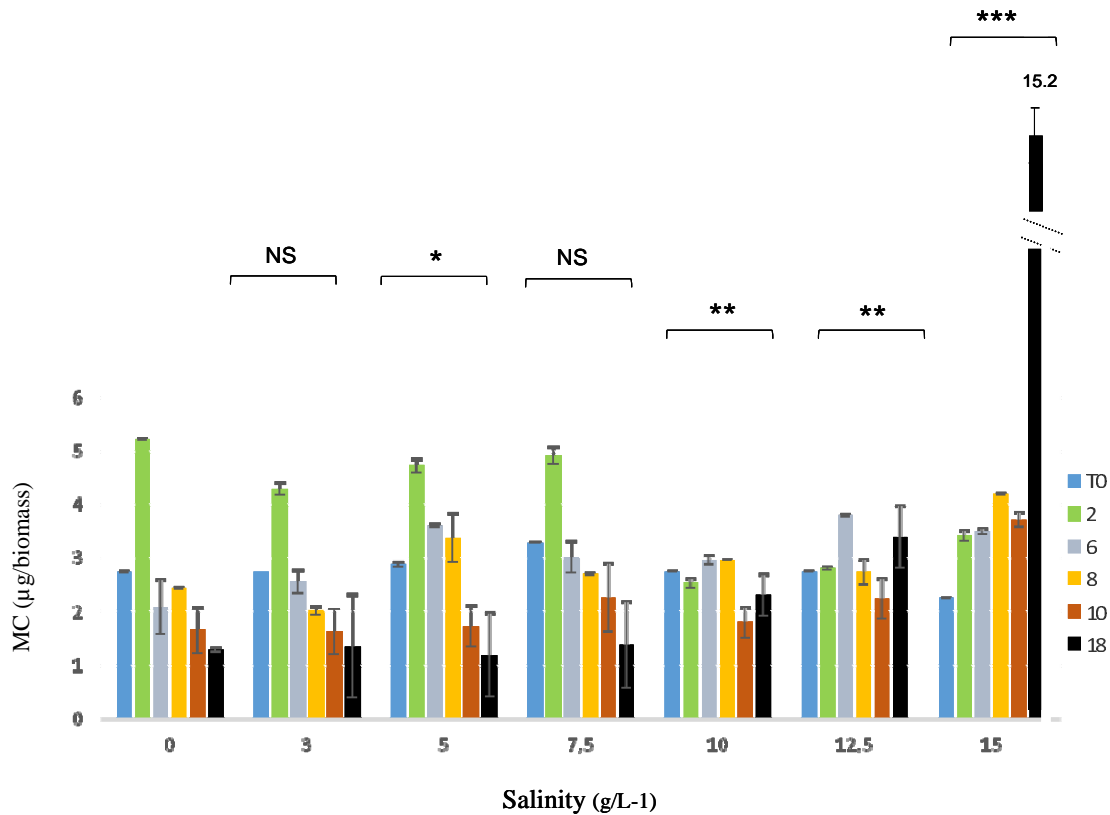

375

376

## 377 DISCUSSION

### 378 *Effects of salinity on the growth and morphology of P. agardhii 'Brack strain'*

379 Our results have highlighted differences in the growth phases according to salt  
380 concentration, including a general decrease of the growth rate as the salinity increased (up to  
381  $7,5 \text{ g L}^{-1}$ ), but at the same time, a persistence and a survival at  $15\text{g/L}^{-1}$  for several weeks.  
382 These findings reveal a higher tolerance of salinity for one *P. agardhii* strain when compared  
383 with the few available studies in literature (Chomerat *et al.* 2007; Komarek and Anagnostidis  
384 2005; Orr *et al.* 2004). Nevertheless, morphological changes were observed throughout the

385 experiment, suggesting an effective salt stress, which was still not sufficient enough to  
386 produce drastic effects on the survival of the population. While no significant difference was  
387 detected for the different salinities during the lag phase ( $p > 0,05$  between 0 to 2 days), a rapid  
388 increase in filament length occurred between 4 to 8 days for the cultures exposed to 10 and  
389  $12,5 \text{ g L}^{-1}$  of salinity (Fig. 2). The elongation process could be the premise of cellular growth  
390 dysfunction or disruption in morphological processes (Singh and Montgomery 2013 a,b),  
391 which cannot divide properly under this stressor. This temporary step was followed by a  
392 contrasting significant reduction of the filament length (Fig. 2A after 12 days) and the  
393 appearance of an increasing amount of short filaments (6-times less in size than control) from  
394 Day 10 to Day 18 (Fig. 2) for  $10\text{-}15 \text{ g L}^{-1}$  treatments. The presence of broken filaments  
395 suggests some cellular damages (Montgomery 2015) and has already been reported as a stress  
396 response of the cyanobacteria to environmental pressure (Singh and Montgomery 2013 a;  
397 Poullickova *et al.* 2004). In these conditions, the shortened filaments could be a mechanism of  
398 defense used by the cells to preserve energy (Romo and Miracle 1993) and maintain the  
399 integrity of the few cells standing. Indeed, the “*in vivo*” chlorophyll autofluorescence  
400 revealed a high intensity of fluorescence signal in the short fragments at  $15 \text{ g L}^{-1}$  (Figs.2 C-D)  
401 which, combined with light microscopy, indicate that the integrity of the cells is still  
402 maintained as well as the active photosynthetic pigments within the cells. Although the best  
403 way to assess cell viability is the use of staining methods with fluorescent dyes (Pouneva  
404 1997), autofluorescence of pigments may constitute a convenient method to evaluate the  
405 physiological state of the cell (Corrobé *et al.* 2017). At  $12.5$  to  $15 \text{ g L}^{-1}$  of salinity, intense  
406 fluorescence in most short fragments was recorded, while a few cells exhibit non  
407 photosynthetic fluorescent signals (dark cells- Fig. 2D) which correspond to necridia involved  
408 in the fragmentation of filaments (Komarek and Anagnostidis 2005; Castenholtz and  
409 Waterbury 1989). Interestingly, these suicidal cells can be seen as a relevant strategy for cell  
410 dissemination, consequently increasing the chance to find a more suitable habitat to restart a  
411 growing population (Komarek and Anagnostidis 2005).

#### 412 *Effects of salinity on the total MC-content*

413 In our investigation, the total MC content is positively correlated with the *P. agardhii*  
414 biomass for all salinity treatments (except the  $15 \text{ g L}^{-1}$ ), which corroborates some previous  
415 studies (Paerl and Otten 2013; Mazur-Marzec *et al.* 2008; Dolman *et al.* 2012; Lyck 2004).  
416 No drastic effect was recorded immediately after exposure to high salinity, as expected for



417 concentration (*e.g.* 15 g L<sup>-1</sup>) which might release a massive MC amount within the first 24  
418 hours due to the osmotic shock and the cell death, as was mentioned for other cyanobacterial  
419 species when exposed to pulse salt treatment (Tolar 2012). In this study, the MC-quota values  
420 were not significantly different between the 10-15 g L<sup>-1</sup> suggesting that the cells are still able  
421 to cope with this stressor for a relative long period (from 2 to 15 days). Some studies have  
422 also shown that salinities up to 10 g L<sup>-1</sup> do not affect the MC cell quota for *Microcystis*,  
423 *Anabaena* and *Anabaenopsis* genera (Black *et al.* 2011; Martin-Luna *et al.* 2015).  
424 Surprisingly, at the end of the experiment for the 15g/L treatment, a maximal peak of MC was  
425 detected (7- times higher than the control and 5 times higher than the previous MC amount at  
426 Day 15). Considering the cell density decline and the increased amount of short fragments,  
427 this suggests that massive cell disruption may have resulted in accumulation of stable MC in  
428 the medium. Indeed, some MC variants can be detectable and intact for up to several months  
429 (Zaspeta *et al.* 2014; Miller *et al.* 2010). The identification of the MC-profiles of the 'Brack'  
430 strain (performed by ESI-LC MS/MS) revealed that MC-LR is one of the two major variants,  
431 which is, with the dominance of Asp3 MC-RR, characteristic of the *Planktothrix agardhii*  
432 species (Fastner *et al.* 1999; Kurmayer *et al.* 2005). Because the ELISA tests were performed  
433 on both the extra- and intracellular MC fractions, it cannot be excluded that a possible high  
434 increase of MC production by living cells may contribute to the total amount of MC content.

#### 435 *Ecological and management implications*

436 Most of the investigations focusing on cyanobacterial responses to salt tolerance have  
437 reported controversial results (Tolar 2012; Tonk *et al.* 2007; De Pace *et al.* 2014) even at the  
438 intraspecific level (Otsuka *et al.* 1999). Some reports have shown discrepancies in the salinity  
439 thresholds for survival of *Microcystis* spp. (Orr *et al.* 2004; Tonk *et al.* 2007) for which some  
440 strains could resist to 10 g L<sup>-1</sup> of NaCl, while other reached their limit at 2 g L<sup>-1</sup>, leading the  
441 authors to consider a strain-specific halotolerance rather than a species-specific trait (Orr *et al.*  
442 2004). The salt-tolerance variability seems highly dependent on the life-history of each strain,  
443 implying direct and/or repetitive exposure to the stressor, which may induce acclimation and  
444 drive some intraspecific differences between strains. In our study, the unexpected survival of  
445 our *P. agardhii* strain to 15 g L<sup>-1</sup> for several weeks may be a strain-specific response, as it was  
446 acclimated to the low salinity occurring in its brackish pond of origin (3 g L<sup>-1</sup> of salinity –  
447 Vergalli 2013). During the last decade, several episodes of increasing salinities (3 to 8 g L<sup>-1</sup>)  
448 were recorded in this pond, which may have selected some ecotypes adapted to the changing  
449 environment, as it suggested by Kirkwood *et al.* (2008). Common freshwater cyanobacterial

450 species are able to tolerate salinity at low concentrations (Orr *et al.* 2004; Laamanen *et al.*  
451 2001) and acclimate to salinity with time (Barron *et al.* 2002) and locations (brackish areas-  
452 Bergmann *et al.* 2008), unlike other phytoplankton groups (*i.e.* eukaryotes- Moisander *et al.*  
453 2002). The potential shift of their halotolerance threshold and ability to tolerate salt variations  
454 arise the question of their potential persistence in the downstream waters including estuarine  
455 and coastal areas after meteorological-drifting events (caused by strong rainfalls or floods)  
456 (De Pace *et al.* 2014). It would be a serious issue since these cyanobacterial species are also  
457 toxin-producing cells and hence could contaminate the aquaculture and fisheries farms located  
458 along the freshwater-marine continuum (Bergmann *et al.* 2008). Finally, it may be a crucial  
459 issue for water management strategies based on the increase and/or oscillations of salinity  
460 concentration in freshwater systems, as already implemented in several countries such as the  
461 Netherlands (Verspagen *et al.* 2006). Our results clearly show that increasing the salt  
462 concentration of a brackish Mediterranean pond by water input or by a pseudo-natural  
463 salinization (Cf. Vergalli 2013) will not eradicate *Planktothrix agardhii* populations if the  
464 salinity is not up to 15 g L<sup>-1</sup>. Besides salt stress often increase lysis of MC-producing cells  
465 which may affect directly or indirectly all the living organisms in aquatic systems. Thus, care  
466 must be taken when considering increasing of salinity as a potential water management or  
467 remediation strategy. It may render a regular checking and security procedure necessary,  
468 especially in the recreational areas.

## 469 CONCLUSION

470 Elevated salinities (up to 12.5 g L<sup>-1</sup>) affected the cellular growth and morphology of the Brack  
471 strain, as suggested by a lower growth rate and an increase of short broken filaments.  
472 However, *P. agardhii* was able to tolerate moderate to high amount of salinities. The  
473 threshold for normal growth seemed to be set at 15 g L<sup>-1</sup> of salinity, but this concentration  
474 allowed survival of the strain, without a minute lethal salt-shock at least during the time frame  
475 (18 days). The constant amount of MC products overtime may lead to a real harmful effect on  
476 the environment and aquatic organisms. Our findings may be important to take into account  
477 when considering the water management policies based on salinity increase, planned by  
478 several countries to eradicate toxic and bloom-forming species. This study emphasizes the  
479 crucial need to further investigate the gradual and repetitive increasing of salinity as an  
480 indirect consequence of the global warming change, on the acclimation and/or adaptive  
481 response of these filamentous toxic cyanobacteria worldwide.

482

## 483 **ACKNOWLEDGEMENTS**

484 Financial support was provided by the “Region Provence Alpes Côte d’Azur” (PACA-  
485 France). Many thanks to the mass spectrometry facilities of MNHN (Paris-France) and the  
486 technical coordinators from SIBOJAĬ.

487

## 488 **AUTHOR CONTRIBUTIONS**

489 SF, KC, JV conceived and designed the experiments. JV and AC performed the experiments.  
490 SF and KC wrote the paper. All authors approved the final manuscript.

491

## 492 **REFERENCES**

- 493 Babica P, Bláha L, Maršálek B. Exploring the natural role of microcystins – a review of  
494 effects on photoautotrophic organisms. *J Phycol* 2006, **42**: 9–20.
- 495 Barron S, Weber C, Marino R, Davidson E, Tomasky G, Howarth R. Effects of varying  
496 salinity on phytoplankton growth in a low-salinity coastal pond under two nutrient  
497 conditions. *Biol Bull* 2002, **203**:260-261.
- 498 Bergmann I, Geiss-Brunschweiler U, Hagemann M, Schoor A. Salinity tolerance of the  
499 chlorophyll b-synthesizing cyanobacterium *Prochlorothrix hollandica* strain SAG 10.89.  
500 *Microbiol Ecol* 2008, **55**:685-696.
- 501 Black K, Yilmaz M, Philips EJ. Growth and toxin production by *Microcystis aeruginosa* PCC  
502 7806 (Kutz.) Lemmerman at elevated salt concentrations. *J Environ Prot* 2011, **2**: 669-  
503 674.
- 504 Briand JF, Jacquet S, Flinois C, Avois-Jacquet C, Maissonette C, Leberre B, Humbert JF.  
505 Variations in the Microcystin Production of *Planktothrix rubescens* (Cyanobacteria)  
506 Assessed from a Four-Year Survey of Lac du Bourget (France) and from Laboratory  
507 Experiments. *Microbiol Ecol* 2005, **50**: 418-428.

- 508 Carey CC, Ibelings BW, Hoffmann EP, Hamilton DP, Brookes JD. Eco-physiological  
509 adaptations that favour freshwater cyanobacteria in a changing climate. *Water Res* 2012,  
510 **46**: 1394-1407.
- 511 Castenholtz RW, Waterbury JB. Group I. Cyanobacteria.. In: *Bergey's manual of systematic*  
512 *bacteriology*. Stanley JT, Bryant MP, Pfenning N, Holt JG. (Eds), Baltimore, William &  
513 Wilkins, 1989.
- 514 Chomerat N, Garnier R, Bertrand C, Cazaubon A. Seasonal succession of cyanoprokaryotes  
515 in a hypereutrophic oligo-mesohaline lagoon from the South of France. *Estuar Coast*  
516 *Shelf S* 2007, **72**: 591-602.
- 517 Chorus I, Bartram J. *Toxic cyanobacteria in water: A guide to their public health*  
518 *consequences, monitoring and management*. 1<sup>st</sup> ed., E. & FN Spon: London, UK, 1999.
- 519 Combes A, Dellinger M, Cadel-six S, Amand S, Comte K. Ciliate *Nassula* sp. grazing on a  
520 microcystin-producing cyanobacterium (*Planktothrix agardhii*): impact on cell growth  
521 and in the microcystin fractions. *Aquatic Toxicol* 2013, **126**: 435 – 441.
- 522 Corrobé LM, Obiol A, Solé A, Esteve I. A novel method to analyse in vivo the physiological  
523 state and cell viability of phototrophic microorganisms by confocal scanning microscopy  
524 using a dual laser. *JMicroscopy* 2017, **268**: doi: 10.1111/jmi.12586.
- 525 Davis T, Berry WDL, Boyer GL, Gobler CJ. The effects of temperature and nutrients on the  
526 growth and dynamics of toxic and non-toxic strains of *Microcystis* during cyanobacteria  
527 blooms. *Harmful Algae* 2009, **8**:715-725.
- 528 De Pace R, Vita V, Bucci MS, Gallo P, Bruno M. Microcystin concentration in sea mussel  
529 farms from the Italian southern Adriatic coast following cyanobacterial blooms in the  
530 artificial reservoir. *J Ecosyst* 2014, **1**: 1-12.
- 531 Djediat C, Moyenga D, Malécot M, Comte K, Yéprémian C, Bernard C, Puisieux-Dao S,  
532 Edery M. Oral toxicity of the microcystin-containing cyanobacterium *Planktothrix*  
533 *agardhii* to the medaka fish (*Oryzias latipes*). *Toxicon* 2011, **58**: 112-122.
- 534 Dolman AM, Rücker J, Pick FR, Fastner J, Rohrlack T, Mischke U, Wiedner C.  
535 Cyanobacteria and Cyanotoxins: The Influence of Nitrogen versus Phosphorus. *Plos One*  
536 2012, **7**: e38757.

- 537 Downing TG, Sember CS, Gehringer MM, Leukes V. Medium N: P ratios and specific  
538 growth rate comodule microcystin and protein content in *Microcystis aeruginosa*  
539 PCC7806 and *Microcystis aeruginosa* UV027. *Microb Ecol* 2005, **49**: 468-473.
- 540 Fastner J, Erhard M, Carmichael WW, Sun F, Rinehart KL, Ronicke H, Chorus I.  
541 Characterization and diversity of microcystins in natural blooms and strains of the genera  
542 *Microcystis* and *Planktothrix* from German freshwaters. *Archiv Fur Hydrobiol* 1999,  
543 **145**: 147-163.
- 544 Hagemann M. Molecular biology of cyanobacterial salt acclimation. *FEMS Microbiol Rev*  
545 2011, **35**: 87-123.
- 546 Hesse K, Kohl JG. *Effects of light and nutrient supply on growth and microcystin content of*  
547 *different strains of Microcystis aeruginosa- Cyanotoxins - Occurrence, Causes,*  
548 *Consequences*. 1<sup>st</sup> ed. Chorus I ; Springer: Berlin, 2001.
- 549 Kaebernick M, Neilan BA. 2001. Ecological and molecular investigations of cyanotoxin  
550 production. *FEMS Microbiol Ecol* 2001, **35**: 1-9.
- 551 Kahm M, Hasenbrink G, Lichtenberg-Frate H, Ludwig J, Kschischo M. Grofit: Fitting  
552 biological growth curves with R. *J Statistical Software* 2010, **33**:1-21.
- 553 Kirkwood A E, Buchheim JA, Buchheim MA, HenleyWJ. Cyanobacterial diversity and  
554 halotolerance in a variable hypersaline environment. *Microbial Ecol* 2008, **55**:453-465
- 555 Komárek J, Anagnostidis K. Cyanopokaryota 2. Teil/ 2nd Part: Oscillatoriales. In  
556 *Süßwasserflora von Mitteleuropa* 19/2. Büdel B, Krienitz L, Gärtner G, Schagerl M  
557 Eds. Elsevier/Spektrum: Heidelberg, Germany, 2005.
- 558 Kotai J. 1972. Instructions for preparation of modified nutrient solution Z8 for algae,  
559 *Norwegian Institute for Water Res* , Oslo 1972.
- 560 Kurmayer R, Christiansen G, Fastner J, Borner T. Abundance of active and inactive  
561 microcystin genotypes in populations of the toxic cyanobacterium *Planktothrix* spp.  
562 *Environ Microbiol* 2004, **6**: 831-841.
- 563 Kurmayer R, Christiansen G, Gumpenberger M, Fastner J. Genetic identification of  
564 microcystin ecotypes in toxic cyanobacteria of the genus *Planktothrix*. *Microbiology-*  
565 *SGM* 2005, **151**:1525-1533.

- 566 Laamanen MJ, Gugger M, Lehtimäki JM. Diversity of toxic and nontoxic *Nodularia* isolates  
567 (Cyanobacteria) and filaments from the Baltic Sea. *Appl Environ Microbiol* 2001, **67**:  
568 4638-4647.
- 569 Leao PN, Vasconcelos M, Vasconcelos VM. Allelopathy in freshwater cyanobacteria. *Crit*  
570 *Rev Microbiol* 2009, **35**: 271-282.
- 571 Lehman PW, Boyer G, Hall C, Waller S, Gehrts K. Distribution and toxicity of a new colonial  
572 *Microcystis aeruginosa* bloom in the San Francisco Bay Estuary, California.  
573 *Hydrobiologia* 2005, **541**: 87-89.
- 574 Lyck S. Simultaneous changes in cell quotas of microcystin, chlorophyll a, protein and  
575 carbohydrate during different growth phases of a batch culture experiment with  
576 *Microcystis aeruginosa*. *J Plankton Res* 2004, **26**:727-736.
- 577 Martin-Luna B, Sevilla E, Bes MT, Fillat MF, Peleato ML. Variation in the synthesis of  
578 microcystin in response to osmotic stress in *Microcystin aeruginosa* PCC 7806.  
579 *Limnetica* 2015, **34**: 205-2014.
- 580 Mazur-Marzec H, Spooł L, Kobos J, Plinski M, Meriluoto J. Cyanobacterial hepatotoxins,  
581 microcystins and nodularins, in fresh and brackish waters of the Pomeranian Province,  
582 northern Poland. *Oceanol Hydrobiol St* 2008, **37**: 3-21.
- 583 Miller MA, Kudela RM, Mekebri A, Crane D, Oates SC, Tinker MT, Staedler W, Miller M,  
584 Toy-Choutka WA, Dominik S, Hardin C, Langlois D, Murray G, Ward MK, Jessups DA.  
585 Evidence for a novel marine harmful algal bloom cyanotoxins (microcystin) transfer  
586 from land to sea otters. *PLoS One* 2010, **5**: 1-11.
- 587 Moisander MP, McClinton E, Paerl HW. Salinity effects on growth, photosynthetic  
588 parameters, and nitrogenase activity in estuarine planktonic cyanobacteria. *Microbiol*  
589 *Ecol* 2002, **43**: 432-442.
- 590 Montgomery B L. Light-dependent governance of cell shape dimensions in cyanobacteria.  
591 *Front Microbiol* 2015, **6**: 514, doi: 10.3389/fmicb.2015.00514
- 592 N'Dong M, Bird D, Tri NQ, De Boutray ML, Zamyadi A, Vincon-Leite B, Lemaire BJ,  
593 Prevost M, Dorner S. Estimating the risk of cyanobacterial occurrence using an index

- 594           integrating meteorological factors: Application to drinking water production. *Water Res*  
595           2014, **56**: 98-108.
- 596   Orr PT, Jones GJ, Douglas GB. Response of cultured *Microcystis aeruginosa* from the Swan  
597           River, Australia, to elevated salt concentration and consequences for bloom and toxin  
598           management in estuaries. *Mar Freshw Res*, 2004, **55**: 277–283.
- 599   Otsuka S, Suda S, Li R, Watanabe M, Oyaizu H, Matsumoto S, Watanabe S, Makoto M.  
600           Characterization of morphospecies and strains of the genus *Microcystis* (cyanobacteria)  
601           for a reconsideration of species classification. *Phycol Res* 1999, **47**: 189-197.
- 602   Paerl HW, Paul VJ. Climate change: Links to global expansion of harmful cyanobacteria.  
603           *Water Res* 2012, **46**: 1349-1363.
- 604   Paerl HW, Otten T. Harmful Cyanobacterial Blooms: Causes, Consequences, and Controls.  
605           *Microb Ecol* 2013, **65** 995-1010.
- 606   Pearson L, Mihali T, Moffitt M, Kellmann R, Neilan B. On the Chemistry, Toxicology and  
607           Genetics of the Cyanobacterial Toxins, Microcystin, Nodularin, Saxitoxin and  
608           Cylindrospermopsin. *Marine Drugs* 2010, **8**: 1650-1680.
- 609   Poulickova A, Hasler P, Kitner M. Annual cycle of *Planktothrix agardhii*. Nature population.  
610           *Int Rev Hydrobiol* 2004, **89**: 278-288.
- 611   Pouneva I. Evaluation of algal culture viability and physiological state by fluorescent  
612           microscopic methods. *Bul J Plant Physiol* 1997, **23**: 67-76.
- 613   Pouria S, De Andrade A, Barbosa J, Cavalcanti RL, Barreto V T S, Ward CJ, Preiser W, Poon  
614           GK, Neild GH, Codd GA. Fatal microcystin intoxication in haemodialysis unit in  
615           Caruaru, Brazil. *Lancet* 1998, **352**: 21-26.
- 616   Preece E, Hardy FJ, Moore BC, Bryan M. A review of microcystin detections in Estuarine  
617           and Marine waters: environmental implications and human health risks. *Harmful Algae*  
618           2017, **61**: 31-45.
- 619   Ressom R, San Soong F, Fitzgerald J, Turczynowicz L. *Health effects of toxic cyanobacteria*.  
620           1<sup>st</sup> ed., Service A G P ed. Canberra, pp. 27-69, 1994.
- 621   Rippka R. Isolation and purification of Cyanobacteria. *Methods Enzymol* 1988,**167**: 3-27.



- 622 Robson BJ, Hamilton,DP. Summer flow event induces a cyanobacterial bloom in a seasonal  
623 western Australia estuary. *Mar Freshw Res* 2003, **54**: 139-151.
- 624 Rojo C, Alvarez Cobelas M. Population dynamics of *Limnothrix redekei*, *Oscillatoria*  
625 *lanceaeformis*, *Planktothrix agardhii* and *Pseudanabaena limnetica* (cyanobacteria) in a  
626 shallow hypertrophic lake (Spain). *Hydrobiologia*. 1994, **275**: 165-171.
- 627 Romo S, Miracle MR. Long-term periodicity of *Planktothrix agardhii*, *Pseudanabaena*  
628 *galeata* and *Geitlerinema sp.* in a shallow hypertrophic lagoon, the Albufera of Valencia  
629 (Spain). *Archiv Hydrobiol* 1993, **126** : 469-486
- 630 Roth J, Haycock K, Gagno J, Soper C, Caldarola J. *L'intégré des analyses de données*.  
631 Statview Software, ed., Abacus Concepts, California, 1995.
- 632 Sevilla E, Martin-Luna B, Vela L, Bes MT, Fillat MF, Peleato ML. Iron availability affects  
633 *mcyD* expression and microcystin-LR synthesis in *Microcystis aeruginosa* PCC7806.  
634 *Environ Microbiol* 2008, **10**: 2476-2483.
- 635 Shimizu K, Sano T, Kubota R, Kobayashi N, Tahara M, Obama T, Sugimoto N, Nishimura T,  
636 Ikarashi Y. Effects of the Amino Acid Constituents of Microcystin Variants on  
637 Cytotoxicity to Primary Cultured Rat Hepatocytes. *Toxins* 2014, **6**: 168-179.
- 638 Singh SP, Montgomery BL. Distinct salt-dependent effects impair *Fremyella diplosiphon*  
639 pigmentation and cellular shape. *Plant Signal Behav* 2013a, **8**: e24713.  
640 [Doi.org/10.4161/psb.24713](https://doi.org/10.4161/psb.24713)
- 641 Singh SP, Montgomery BL. Salinity impacts photosynthetic pigmentation and cellular  
642 morphology changes by distinct mechanisms in *Fremyella diplosiphon* *Bioch Biophys*  
643 *Res Comm* 2013 b, **433**: 84-89
- 644 Sivonen K, Jones G. Toxic cyanobacteria in water. In *A guide to their public health*  
645 *consequences, monitoring and management*. 1<sup>st</sup> ed, E & FN Spon: London, UK, pp. 41-  
646 111, 1999.
- 647 Song L, Sano T, Li R, Watanabe MM, Liu Y, Kaya K. Microcystin production of  
648 *Microcystis viridis* (cyanobacteria) under different culture conditions. *Phycol Res* 1998,  
649 **46**: 19-23.



- 650 Spooof L, Catherine A. *Appendix 3: Tables of Microcystins and Nodularins*, in *Handbook of*  
651 *Cyanobacterial Monitoring and Cyanotoxin Analysis*, John Wiley & Sons, Ltd. p. 526-  
652 537, 2017
- 653 Sun J, Liu DY. Geometric models for calculating cell biovolume and surface area for  
654 phytoplankton. *J Plankton Res* 2003, **25**:1331-1346.
- 655 Tolar S. *Salinity tolerance in cyanobacteria and its implications for invasion into Estuarine*.  
656 UNC-Chapel Hill, Chapel Hill, NC (Undergraduate Honors Thesis), 2012..
- 657 Tonk L, Bosch K, Visser PM, Huisman J. Salt tolerance of the harmful cyanobacterium  
658 *Microcystis aeruginosa*. *Aquat Microbial Ecol* 2007, **46**:117-123.
- 659 Tonk L, Visser PM, Christiansen G, Dittmann E, Snelder E, Wiedner C, Mur LR, Huisman J.  
660 The microcystin composition of the cyanobacterium *Planktothrix agardhii* changes  
661 toward a more toxic variant with increasing light intensity. *Appl Environ Microbiol*, **71**:  
662 5177-5181.
- 663 Twoney LJ, Piehler MF, Paerl HW. Priority Parameters for Monitoring of Freshwater and  
664 Marine Systems and their Measurement in Environmental Monitoring. In: *Encyclopaedia*  
665 *of Life Support Systems (EOLSS)*, Developed under the auspices of the UNESCO, 2<sup>nd</sup> ed,  
666 Inyang H I, Daniels D, Eds. Eolss Publishers, Oxford, UK, [<http://www.eolss.net>],  
667 2002..
- 668 Vergalli J. Versatilité  ecologique de la cyanobact rie potentiellement toxique *Planktothrix*  
669 *agardhii* : Influence de la salinit ? PhD, Universit  Aix-Marseille III, France, 255 p,  
670 2013.
- 671 Verspagen JMF, Passarge J, Johnk KD. Water management strategies against toxic  
672 *Microcystis* blooms in the Dutch delta. *Ecological Applications* 2006, **16**: 313-327
- 673 Villena M J, Romo S. Phytoplankton changes in a shallow Mediterranean lake (Albufera of  
674 Valencia, Spain) after sewage diversion. *Hydrobiologia* 2003, **506**: 281-287.
- 675 Von Alvensleben N, Stookey K, Magnusson M, Heimann K. Salinity Tolerance of  
676 *Picochlorum atomus* and the use of salinity for Contamination Control by the Freshwater  
677 Cyanobacterium *Pseudanabaena limnetica*. *PlosOne* 2013, **8**: e63569.  
678 doi:10.1371/journal.pone.0063569.

- 679 Wiedner C, Visser PM, Fastner J, Metcalf JS, Codd GA, Mur LR. Effects of Light on the  
680 Microcystin Content of *Microcystis* Strain PCC 7806. *Appl Environ Microbiol* 2003,  
681 **69**:1475-1481.
- 682 Yuan M, Namikoshi M, Otsuki A, Watanabe F, Rinehart KL. Electrospray ionization mass  
683 spectrometric analysis of microcystins, cyclic heptapeptide hepatotoxins: modulation of  
684 charge states and [M + H]<sup>+</sup> to [M + Na]<sup>+</sup> ratio. *J Am Soc Mass Spec* 1999, **10**: 1138-  
685 1151.
- 686 Zaspeta A, Pick FR, Blais JM. Fate and persistence of particulate and dissolved microcystin-  
687 LA from *Microcystis* blooms. *Hum Ecol Risk Assess* 2014, **20**: 1670-1686.
- 688 Zilliges Y, Kehr JC, Meissner S, Ishida K, Mikkat S, Hagemann M, *et al.* The Cyanobacterial  
689 Hepatotoxin Microcystin Binds to Proteins and Increases the Fitness of *Microcystis* under  
690 Oxidative Stress Conditions. *PlosOne* 2011, **6**: e17615.
